# Supplementary material for: Accelerating multicomponent phase-coexistence calculations with physics-informed neural networks
Source: Royal Society of Chemistry journal article supplement (doi:10.1039/d4me00168k), 2024-12-24
Supplement: d4me00168k1.pdf [file d4me00168k1.pdf]

**Supplementary Information**  
**for**  
**Accelerating Multicomponent Phase-Coexistence**  
**Calculations with Physics-informed Neural Networks**

Satyen Dhamankar,<sup>†,‡</sup> Shengli Jiang,<sup>†,‡</sup> and Michael A. Webb<sup>\*,†</sup>

<sup>†</sup>*Department of Chemical and Biological Engineering, Princeton University, Princeton, NJ*  
*08544, USA*

<sup>‡</sup>*These authors contributed equally to this work.*

E-mail: [mawebb@princeton.edu](mailto:mawebb@princeton.edu)

## Contents

|                                                                   |           |
|-------------------------------------------------------------------|-----------|
| <b>S1 Additional optimized phase diagrams</b>                     | <b>2</b>  |
| <b>S2 Phase classification confusion matrices</b>                 | <b>10</b> |
| <b>S3 Equilibrium composition prediction parity plots</b>         | <b>12</b> |
| <b>S4 Post-ML optimization performance</b>                        | <b>15</b> |
| <b>S5 Impact of Weighting Parameters on the PI+ Loss Function</b> | <b>16</b> |

## S1 Additional optimized phase diagrams

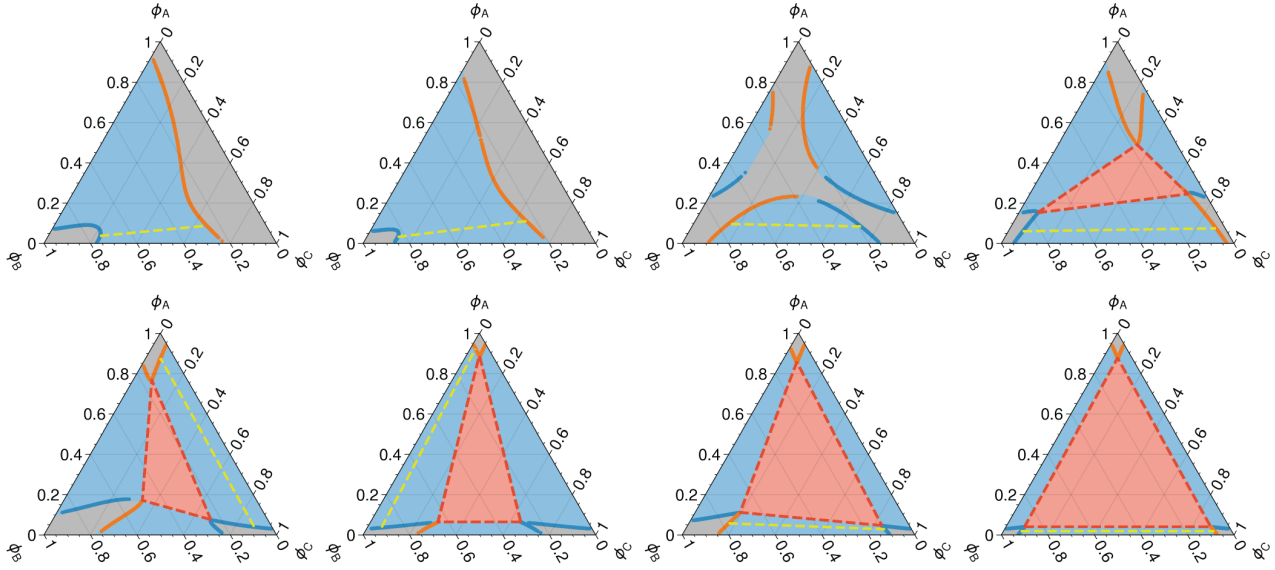

Figure S1: **Additional coexistence curves produced with the post-ML optimization strategy.** The results are obtained using the PI model inference trained with full training data to warm-start Newton-CG optimization. The background color in all phase diagrams denotes the true phase: gray (one-phase), blue (two-phase), and red (three-phase). The scatter points indicate the predicted phase splits for a given initial composition. Blue and orange scatter points indicate two-phase coexistence curves, with the yellow dashed line denoting an example tie line. The vertices of the red triangle indicate three-phase coexistence points. The system parameters  $[\chi_{AB}, \chi_{BC}, \chi_{AC}, \nu_A, \nu_B, \nu_C]$ , for the top row, from left to right are  $[1.0, 2.0, 1.5, 1.5, 1.5, 1.5]$ ,  $[1.0, 2.0, 2.0, 2.0, 1.5, 1.0]$ ,  $[1.5, 1.5, 1.5, 1.5, 2.0, 1.5]$ , and  $[1.5, 1.5, 2.0, 1.5, 1.5, 2.0]$ . For the bottom row, the parameters from left to right are  $[2.0, 1.5, 1.5, 2.0, 1.5, 1.5]$ ,  $[2.0, 2.0, 1.5, 2.0, 1.5, 1.5]$ ,  $[2.0, 1.5, 1.5, 2.0, 1.5, 2.0]$ , and  $[2.0, 2.0, 2.0, 2.0, 1.5, 1.5]$ .

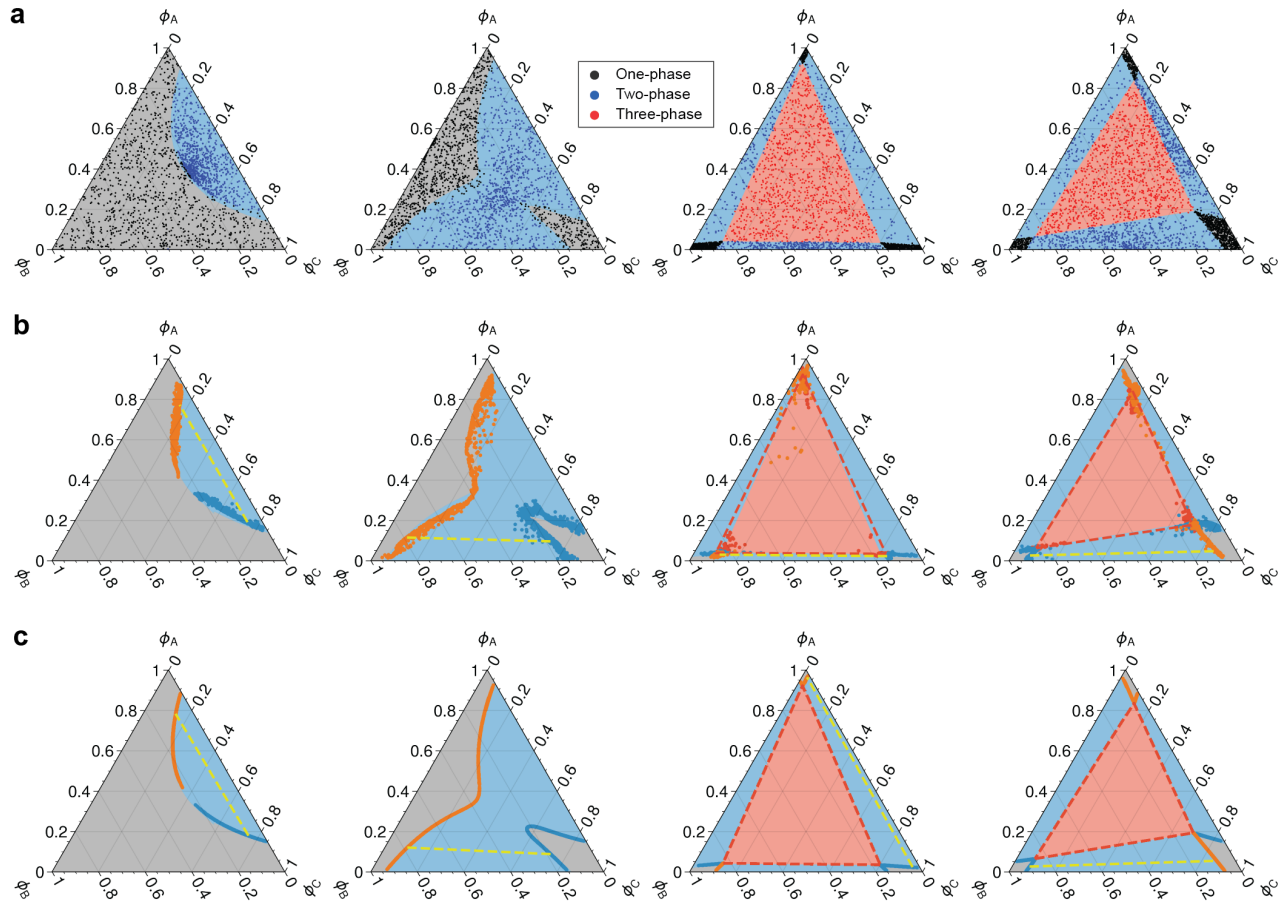

**Figure S2: Baseline model performance in phase-coexistence prediction with 10% of training data.** **a)** Classification of the number of coexisting phases. The background color in all phase diagrams denotes the true phase: gray (one-phase), blue (two-phase), and red (three-phase). The scatter points indicate the predicted phase splits for a given initial composition. Colors in the legend denote the types of predicted splits. **b)** Predicted coexistence curves. Blue and orange scatter points indicate two-phase coexistence curves, with the yellow dashed line denoting an example tie line. The vertices of the red triangle indicate three-phase coexistence points. **c)** Coexistence curves produced with the post-ML optimization strategy. The results are obtained using ML inference to warm-start Newton-CG optimization.

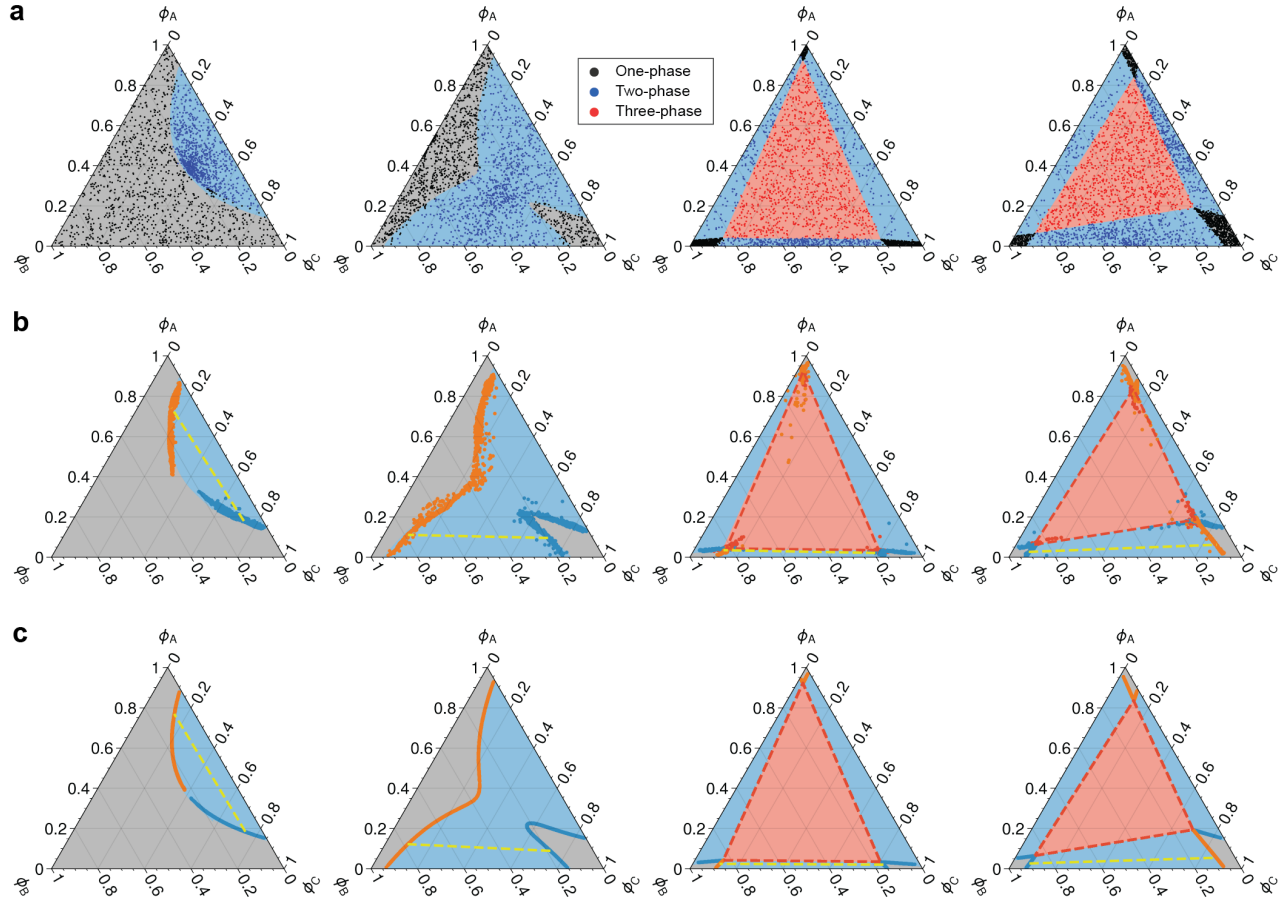

**Figure S3: Baseline model performance in phase-coexistence prediction with full training data.** **a)** Classification of the number of coexisting phases. The background color in all phase diagrams denotes the true phase: gray (one-phase), blue (two-phase), and red (three-phase). The scatter points indicate the predicted phase splits for a given initial composition. Colors in the legend denote the types of predicted splits. **b)** Predicted coexistence curves. Blue and orange scatter points indicate two-phase coexistence curves, with the yellow dashed line denoting an example tie line. The vertices of the red triangle indicate three-phase coexistence points. **c)** Coexistence curves produced with the post-ML optimization strategy. The results are obtained using ML inference to warm-start Newton-CG optimization.

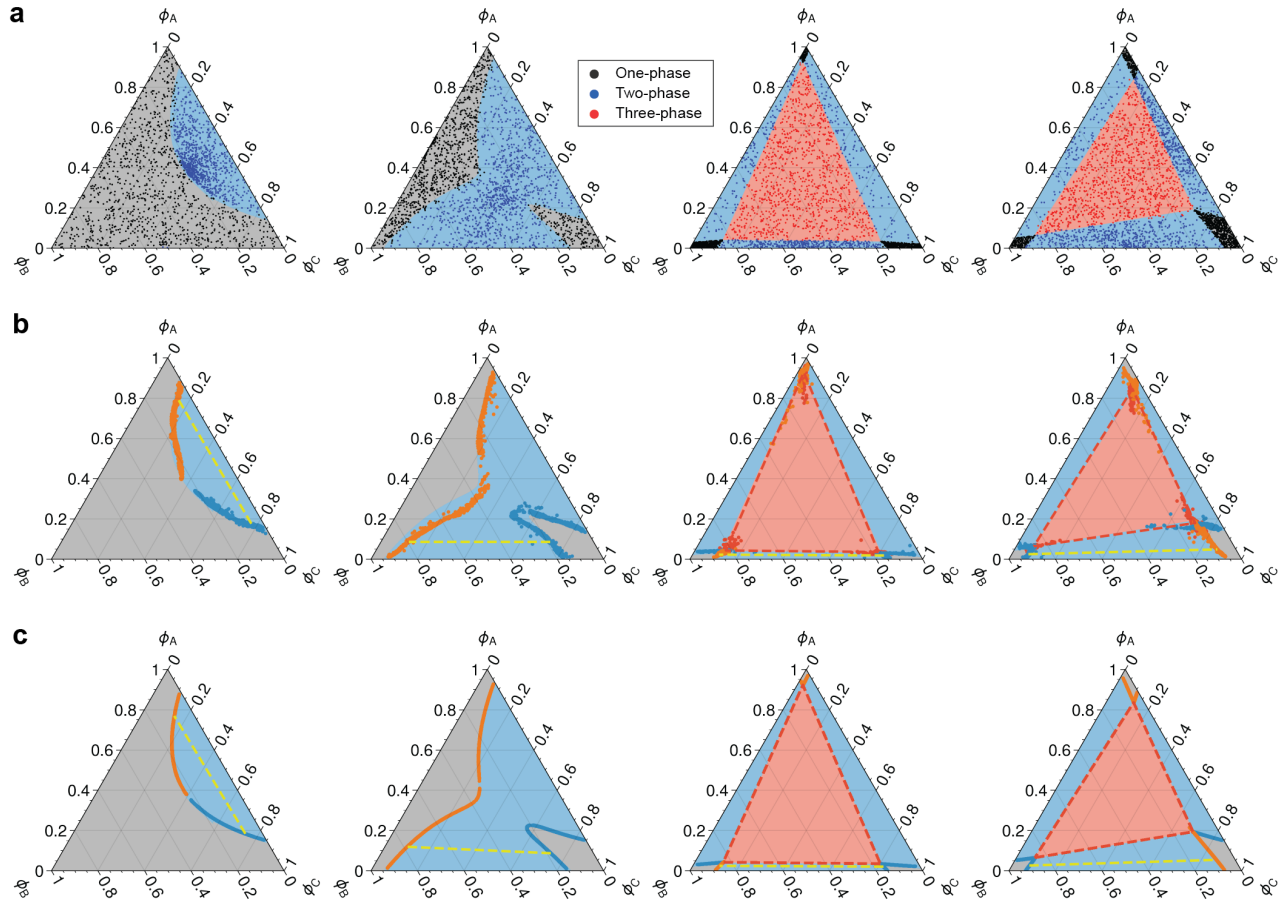

**Figure S4: PI model performance in phase-coexistence prediction with 10% of training data.** **a)** Classification of the number of coexisting phases. The background color in all phase diagrams denotes the true phase: gray (one-phase), blue (two-phase), and red (three-phase). The scatter points indicate the predicted phase splits for a given initial composition. Colors in the legend denote the types of predicted splits. **b)** Predicted coexistence curves. Blue and orange scatter points indicate two-phase coexistence curves, with the yellow dashed line denoting an example tie line. The vertices of the red triangle indicate three-phase coexistence points. **c)** Coexistence curves produced with the post-ML optimization strategy. The results are obtained using ML inference to warm-start Newton-CG optimization.

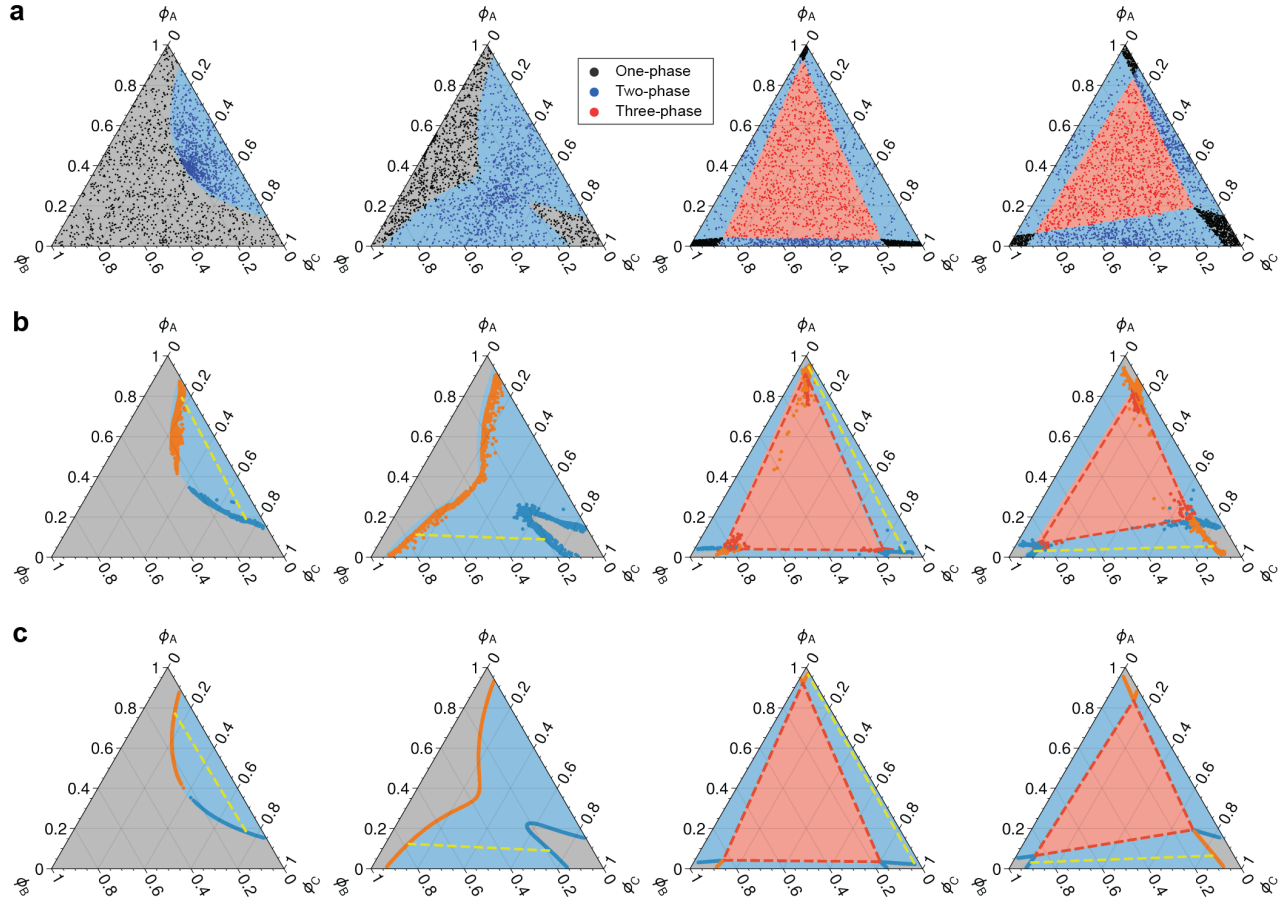

**Figure S5: PI+ model performance in phase-coexistence prediction with 10% of training data.** **a)** Classification of the number of coexisting phases. The background color in all phase diagrams denotes the true phase: gray (one-phase), blue (two-phase), and red (three-phase). The scatter points indicate the predicted phase splits for a given initial composition. Colors in the legend denote the types of predicted splits. **b)** Predicted coexistence curves. Blue and orange scatter points indicate two-phase coexistence curves, with the yellow dashed line denoting an example tie line. The vertices of the red triangle indicate three-phase coexistence points. **c)** Coexistence curves produced with the post-ML optimization strategy. The results are obtained using ML inference to warm-start Newton-CG optimization.

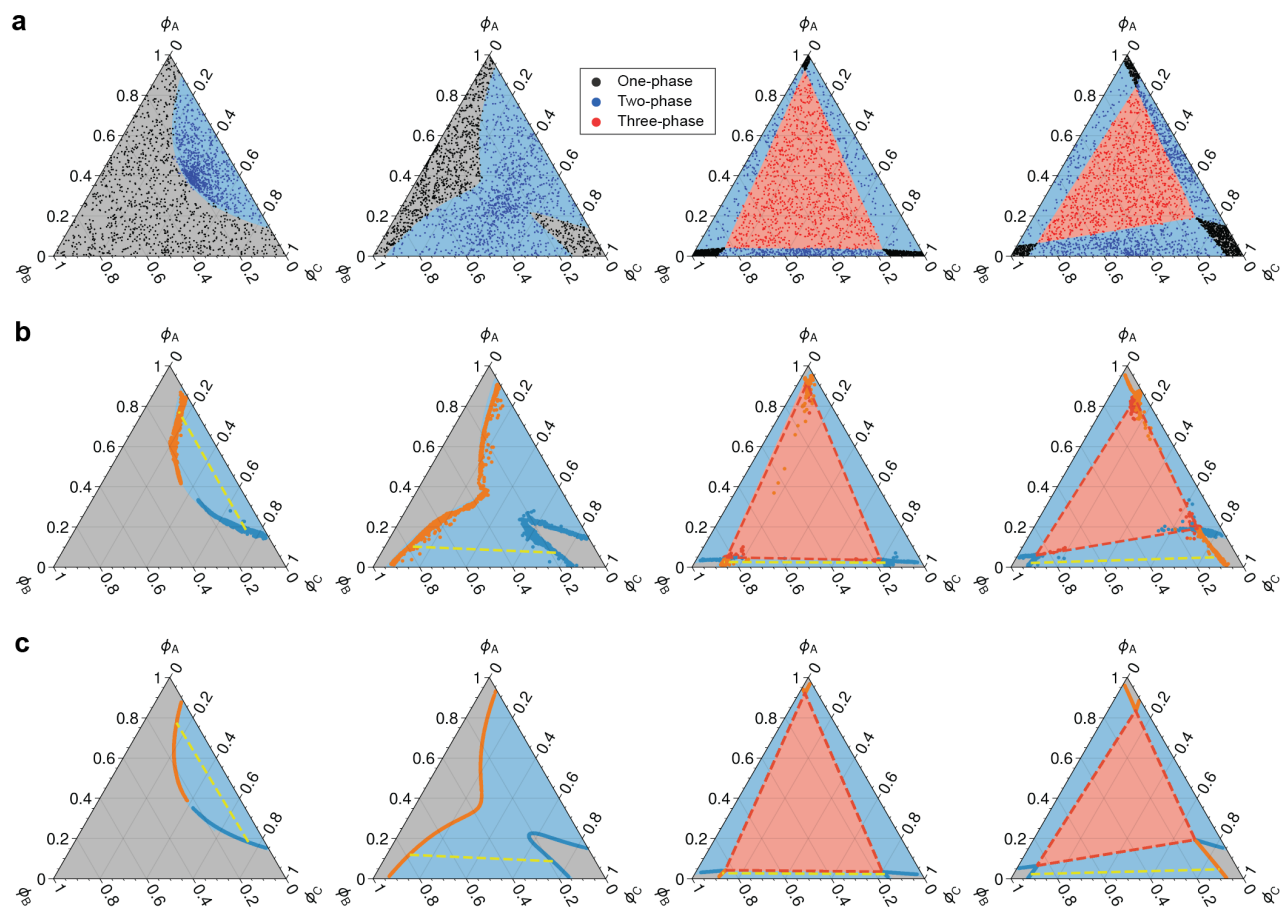

**Figure S6: PI+ model performance in phase-coexistence prediction with full training data.**  
**a)** Classification of the number of coexisting phases. The background color in all phase diagrams denotes the true phase: gray (one-phase), blue (two-phase), and red (three-phase). The scatter points indicate the predicted phase splits for a given initial composition. Colors in the legend denote the types of predicted splits. **b)** Predicted coexistence curves. Blue and orange scatter points indicate two-phase coexistence curves, with the yellow dashed line denoting an example tie line. The vertices of the red triangle indicate three-phase coexistence points. **c)** Coexistence curves produced with the post-ML optimization strategy. The results are obtained using ML inference to warm-start Newton-CG optimization.

Table S1: Parameters for representative systems depicted in main text figures.

| Location                  | Image | $\chi_{AB}$ | $\chi_{BC}$ | $\chi_{AC}$ | $v_A$ | $v_B$ | $v_C$ |
|---------------------------|-------|-------------|-------------|-------------|-------|-------|-------|
| Fig. 3(a)<br>leftmost     |       | 1.0         | 1.0         | 2.0         | 1.5   | 1.0   | 2.0   |
| Fig. 3(a)<br>center-left  |       | 1.5         | 1.5         | 1.0         | 2.0   | 2.0   | 1.5   |
| Fig. 3(a)<br>center-right |       | 1.5         | 2.0         | 2.0         | 1.5   | 1.5   | 1.0   |
| Fig. 3(a)<br>rightmost    |       | 1.531       | 1.869       | 1.477       | 1.739 | 1.497 | 1.975 |
| Fig. 5(a)<br>top-left     |       | 1.0         | 1.0         | 2.0         | 1.0   | 1.5   | 1.5   |
| Fig. 5(a)<br>center-left  |       | 1.5         | 1.0         | 2.0         | 1.5   | 2.0   | 2.0   |
| Fig. 5(a)<br>bottom-left  |       | 1.5         | 1.5         | 2.0         | 1.5   | 1.5   | 2.0   |



Table S2: Parameters for representative systems depicted in main text figures (continued).

| Location                  | Image | $\chi_{AB}$ | $\chi_{BC}$ | $\chi_{AC}$ | $v_A$ | $v_B$ | $v_C$ |
|---------------------------|-------|-------------|-------------|-------------|-------|-------|-------|
| Fig. 6(a)<br>leftmost     |       | 1.5         | 1.0         | 1.0         | 1.5   | 2.0   | 2.0   |
| Fig. 6(a)<br>center-left  |       | 2.0         | 2.0         | 2.0         | 1.0   | 2.0   | 1.0   |
| Fig. 6(a)<br>center-right |       | 2.0         | 2.0         | 1.5         | 2.0   | 2.0   | 1.5   |
| Fig. 6(a)<br>rightmost    |       | 1.5         | 2.0         | 1.5         | 1.5   | 2.0   | 2.0   |

## S2 Phase classification confusion matrices

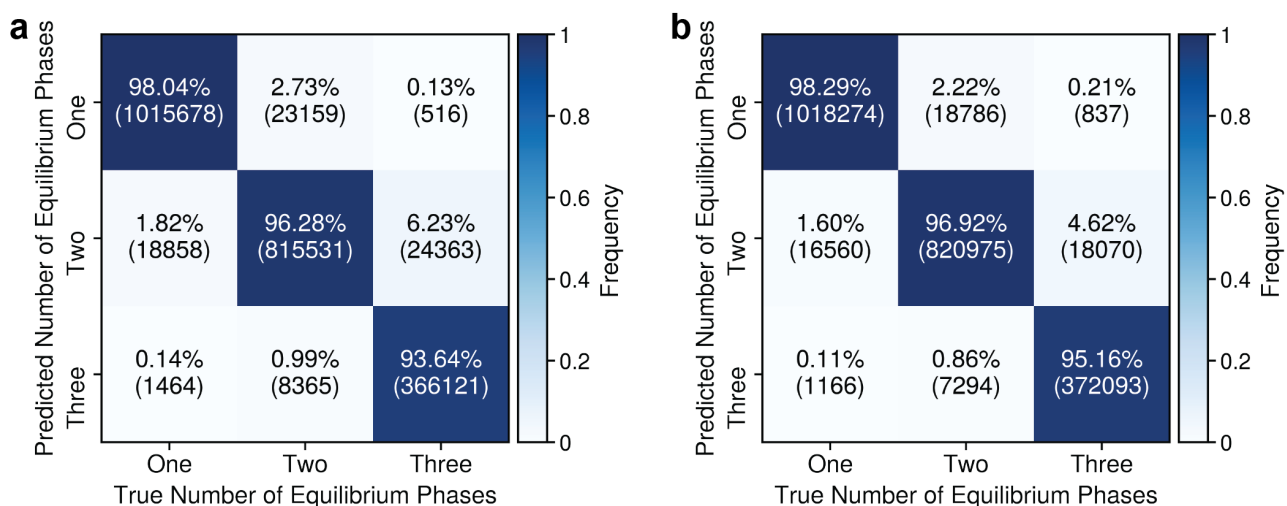

Figure S7: **Confusion matrices for the predicted number of equilibrium phases using the baseline model with a) 10% of training data, and b) with full training data.** Diagonal entries represent correctly classified instances, while off-diagonal entries represent misclassifications.

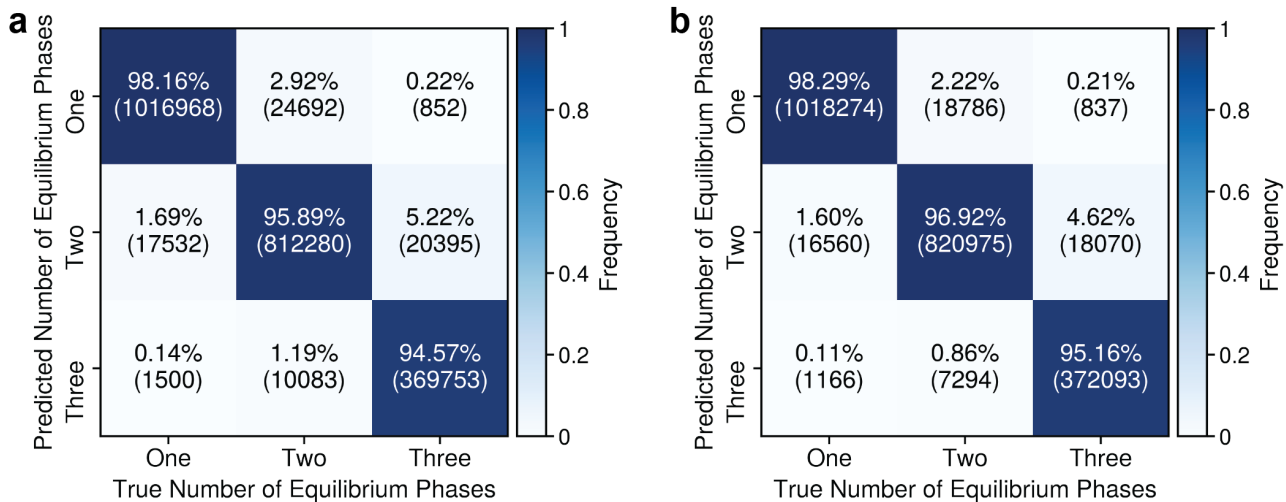

Figure S8: **Confusion matrices for the predicted number of equilibrium phases using the PI model with a) 10% of training data, and b) with full training data.** Diagonal entries represent correctly classified instances, while off-diagonal entries represent misclassifications.

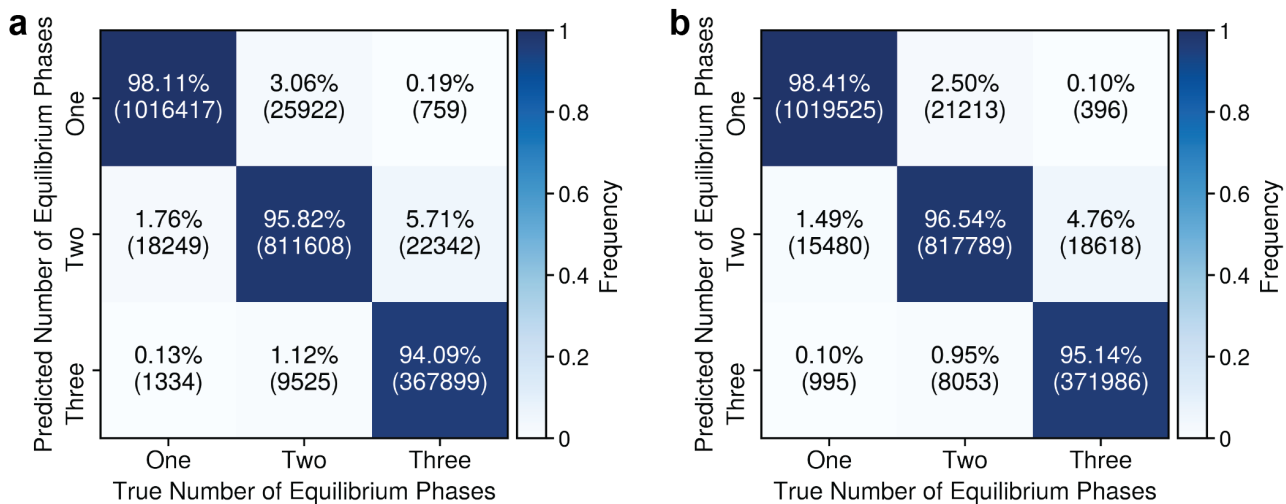

Figure S9: **Confusion matrices for the predicted number of equilibrium phases using the PI+ model with a) 10% of training data, and b) with full training data.** Diagonal entries represent correctly classified instances, while off-diagonal entries represent misclassifications.

### S3 Equilibrium composition prediction parity plots

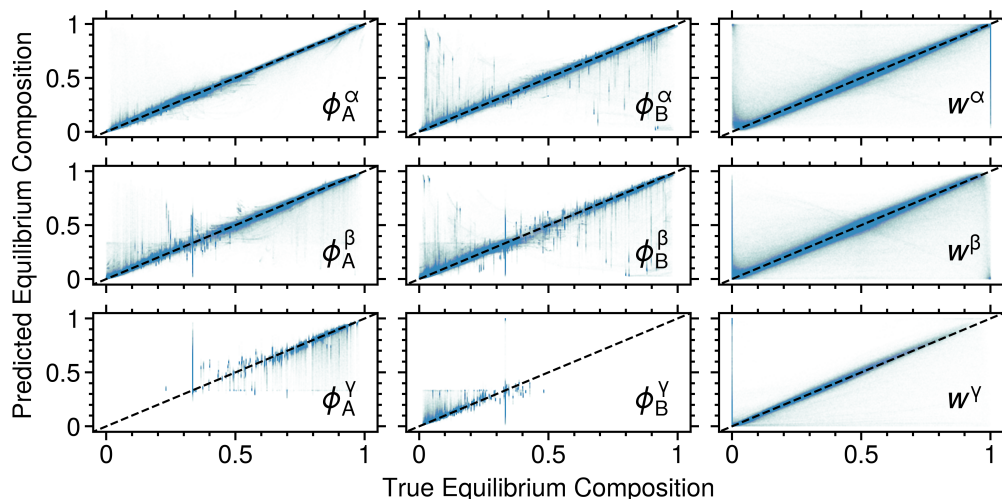

Figure S10: Parity plot for predicted equilibrium composition using the baseline model with 10% of training data. The diagonal dashed line represents perfect performance.

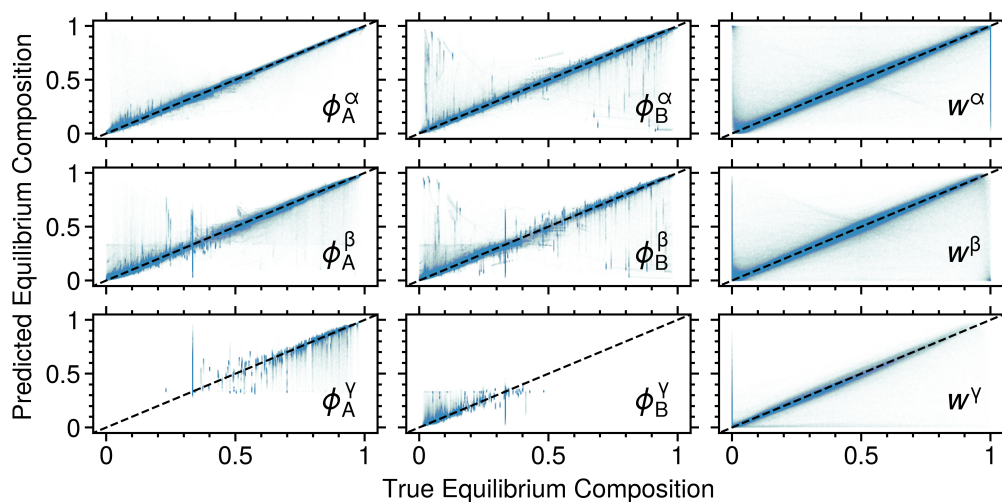

Figure S11: Parity plot for predicted equilibrium composition using the PI model with 10% of training data. The diagonal dashed line represents perfect performance.

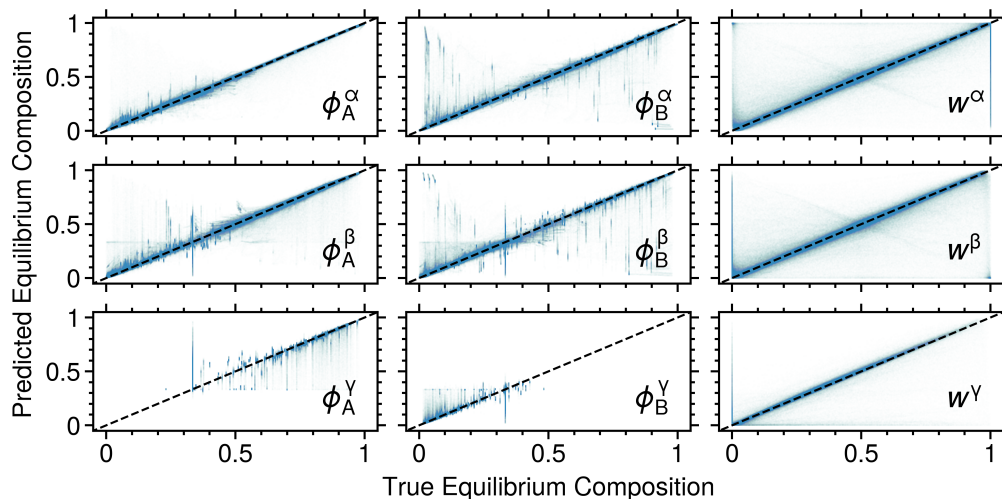

Figure S12: Parity plot for predicted equilibrium composition using the PI model with full training data. The diagonal dashed line represents perfect performance.

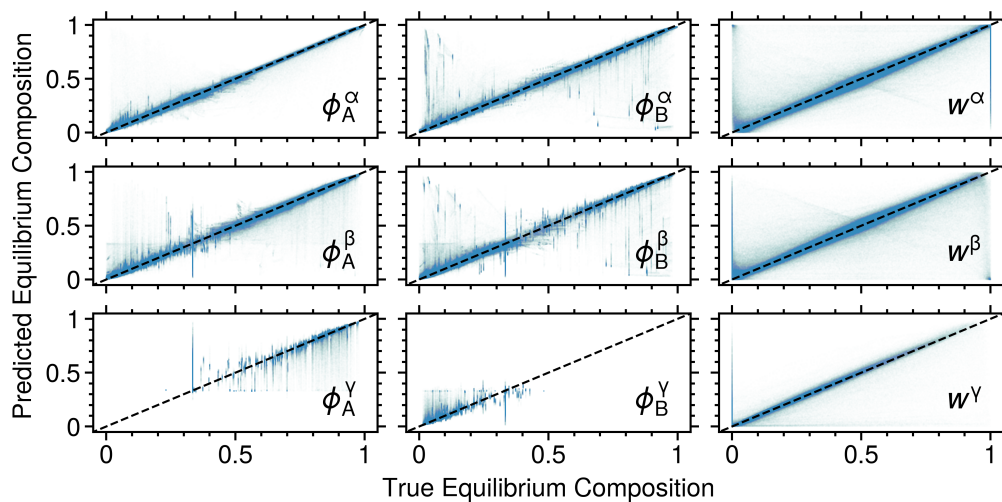

Figure S13: Parity plot for predicted equilibrium composition using the PI+ model with 10% of training data. The diagonal dashed line represents perfect performance.

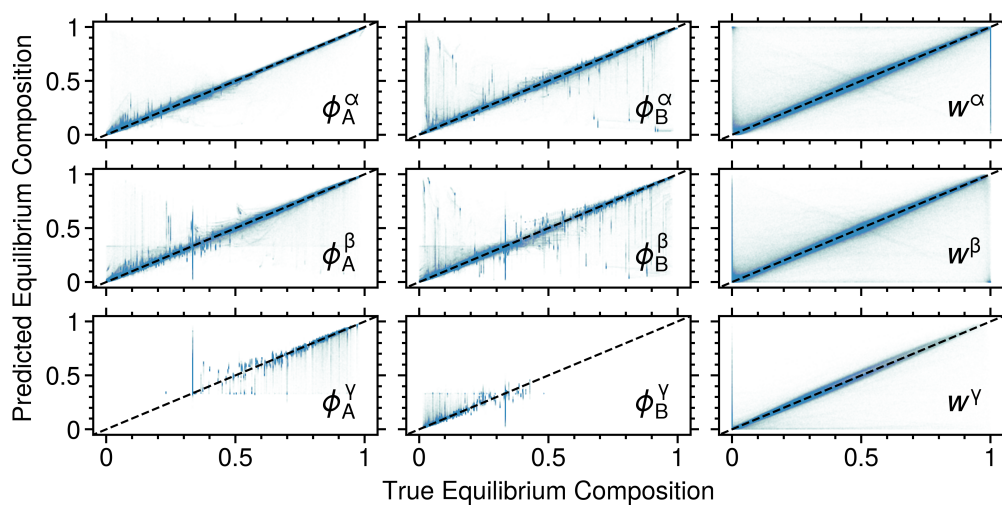

Figure S14: Parity plot for predicted equilibrium composition using the PI+ model with full training data. The diagonal dashed line represents perfect performance.

---

## S4 Post-ML optimization performance

Table S3: **Convergence time and success rate of equilibrium composition prediction with post-ML Newton-CG optimization.** Mean values are reported with standard errors in parentheses. The best result is highlighted in bold and underlined.

|      | Data size | Convergence time per point (sec) | Two-phase success rate      | Three-phase success rate    |
|------|-----------|----------------------------------|-----------------------------|-----------------------------|
| Base | 100%      | <b><u>0.415 (0.024)</u></b>      | 0.993 (0.000)               | <b><u>0.960 (0.001)</u></b> |
| PI   | 100%      | 0.431 (0.021)                    | 0.990 (0.000)               | 0.959 (0.001)               |
| PI+  | 100%      | 0.542 (0.028)                    | 0.990 (0.000)               | 0.923 (0.001)               |
| Base | 10%       | 0.520 (0.030)                    | 0.988 (0.000)               | 0.935 (0.001)               |
| PI   | 10%       | 0.537 (0.021)                    | 0.987 (0.000)               | 0.922 (0.001)               |
| PI+  | 10%       | 0.489 (0.029)                    | <b><u>0.994 (0.000)</u></b> | 0.944 (0.001)               |

## S5 Impact of Weighting Parameters on the PI+ Loss Function

Table S4: Impact of weighting parameters in the loss function (Eq. 15) on the performance of the PI+ model. The rows are ranked by the mean of the sum of equilibrium composition regression  $R^2$  and phase classification  $F_1$ . The parameters used in this study is highlighted in bold and demonstrates statistically equivalent performance to other top-performing parameters. The PI model without physics-informed loss is indicated with an underscore. Performance deteriorates as  $\lambda_f$  increases, while the impact of other parameters is minor.

| $\lambda_{\text{split}}$ | $\lambda_{\Delta\mu}$ | $\lambda_f$  | Mean $R^2$   | Std. $R^2$   | Mean $F_1$   | Std. $F_1$   | Mean $R^2 + F_1 \downarrow$ | Std. $R^2 + F_1$ |
|--------------------------|-----------------------|--------------|--------------|--------------|--------------|--------------|-----------------------------|------------------|
| 0.01                     | 0.1                   | 0.001        | 0.95         | 0.008        | 0.973        | 0.002        | 1.923                       | 0.008            |
| 1                        | 0.1                   | 0.001        | 0.948        | 0.011        | 0.973        | 0.004        | 1.922                       | 0.012            |
| 0.01                     | 0.001                 | 0.001        | 0.948        | 0.009        | 0.972        | 0.002        | 1.92                        | 0.009            |
| 0.001                    | 0.001                 | 0.001        | 0.949        | 0.011        | 0.97         | 0.002        | 1.919                       | 0.012            |
| 0.1                      | 0.1                   | 0.001        | 0.947        | 0.009        | 0.972        | 0.003        | 1.919                       | 0.009            |
| 1                        | 0.01                  | 0.001        | 0.947        | 0.012        | 0.971        | 0.002        | 1.918                       | 0.012            |
| <b>0.01</b>              | <b>0.01</b>           | <b>0.001</b> | <b>0.946</b> | <b>0.012</b> | <b>0.972</b> | <b>0.002</b> | <b>1.917</b>                | <b>0.012</b>     |
| 0.001                    | 0.1                   | 0.001        | 0.946        | 0.008        | 0.972        | 0.002        | 1.917                       | 0.009            |
| 0.1                      | 0.001                 | 0.001        | 0.945        | 0.01         | 0.971        | 0.002        | 1.916                       | 0.01             |
| 0.1                      | 0.01                  | 0.001        | 0.945        | 0.009        | 0.972        | 0.003        | 1.916                       | 0.01             |
| 0.1                      | 1                     | 0.001        | 0.943        | 0.009        | 0.973        | 0.004        | 1.916                       | 0.01             |
| 0.001                    | 0.01                  | 0.001        | 0.945        | 0.01         | 0.97         | 0.002        | 1.915                       | 0.01             |
| 1                        | 0.001                 | 0.001        | 0.945        | 0.01         | 0.97         | 0.002        | 1.915                       | 0.01             |
| 1                        | 0.1                   | 0.01         | 0.944        | 0.007        | 0.972        | 0.003        | 1.915                       | 0.007            |
| <u>0</u>                 | <u>0</u>              | <u>0</u>     | <u>0.945</u> | <u>0.007</u> | <u>0.97</u>  | <u>0.003</u> | <u>1.915</u>                | <u>0.007</u>     |
| 0.001                    | 1                     | 0.001        | 0.942        | 0.01         | 0.973        | 0.003        | 1.914                       | 0.011            |
| 0.01                     | 0.1                   | 0.01         | 0.941        | 0.009        | 0.973        | 0.003        | 1.914                       | 0.01             |
| 0.01                     | 1                     | 0.001        | 0.94         | 0.009        | 0.974        | 0.003        | 1.914                       | 0.01             |
| 0.01                     | 1                     | 0.01         | 0.941        | 0.008        | 0.973        | 0.003        | 1.914                       | 0.008            |
| 1                        | 0.01                  | 0.01         | 0.943        | 0.009        | 0.971        | 0.002        | 1.914                       | 0.009            |
| 1                        | 1                     | 0.001        | 0.942        | 0.006        | 0.972        | 0.002        | 1.914                       | 0.006            |
| 0.1                      | 0.1                   | 0.01         | 0.94         | 0.008        | 0.973        | 0.003        | 1.913                       | 0.008            |
| 0.1                      | 1                     | 0.01         | 0.94         | 0.006        | 0.973        | 0.002        | 1.913                       | 0.007            |
| 1                        | 1                     | 0.01         | 0.94         | 0.008        | 0.973        | 0.003        | 1.913                       | 0.008            |
| 0.001                    | 1                     | 0.01         | 0.938        | 0.011        | 0.973        | 0.003        | 1.911                       | 0.011            |
| 0.001                    | 0.1                   | 0.01         | 0.936        | 0.008        | 0.973        | 0.002        | 1.909                       | 0.009            |
| 0.1                      | 0.01                  | 0.01         | 0.934        | 0.008        | 0.973        | 0.003        | 1.906                       | 0.008            |
| 1                        | 0.001                 | 0.01         | 0.933        | 0.012        | 0.973        | 0.003        | 1.906                       | 0.012            |
| 0.01                     | 0.01                  | 0.01         | 0.933        | 0.01         | 0.973        | 0.002        | 1.905                       | 0.01             |
| 0.001                    | 0.01                  | 0.01         | 0.931        | 0.008        | 0.971        | 0.003        | 1.902                       | 0.008            |
| 0.1                      | 0.001                 | 0.01         | 0.92         | 0.015        | 0.973        | 0.002        | 1.893                       | 0.015            |
| 0.01                     | 0.001                 | 0.01         | 0.914        | 0.01         | 0.973        | 0.002        | 1.888                       | 0.01             |
| 0.001                    | 0.001                 | 0.01         | 0.909        | 0.01         | 0.973        | 0.002        | 1.883                       | 0.01             |



Table S5: **Impact of weighting parameters in the loss function (Eq. 15) on the performance of the PI+ model (continued)**. The rows are ranked by the mean of the sum of equilibrium composition regression  $R^2$  and phase classification  $F_1$ . The parameters used in this study is highlighted in bold and demonstrates statistically equivalent performance to other top-performing parameters. The PI model without physics-informed loss is indicated with an underscore. Performance deteriorates as  $\lambda_f$  increases, while the impact of other parameters is minor.

| $\lambda_{\text{split}}$ | $\lambda_{\Delta\mu}$ | $\lambda_f$ | Mean $R^2$ | Std. $R^2$ | Mean $F_1$ | Std. $F_1$ | Mean $R^2 + F_1 \downarrow$ | Std. $R^2 + F_1$ |
|--------------------------|-----------------------|-------------|------------|------------|------------|------------|-----------------------------|------------------|
| 1                        | 1                     | 0.1         | 0.165      | 0.061      | 0.959      | 0.004      | 1.124                       | 0.061            |
| 0.01                     | 0.01                  | 0.1         | 0.123      | 0.019      | 0.965      | 0.003      | 1.088                       | 0.019            |
| 0.1                      | 0.01                  | 0.1         | 0.124      | 0.03       | 0.964      | 0.002      | 1.088                       | 0.03             |
| 0.1                      | 0.001                 | 0.1         | 0.119      | 0.013      | 0.963      | 0.005      | 1.082                       | 0.014            |
| 0.001                    | 0.01                  | 0.1         | 0.113      | 0.008      | 0.963      | 0.002      | 1.076                       | 0.008            |
| 0.01                     | 0.001                 | 0.1         | 0.104      | 0.031      | 0.962      | 0.007      | 1.066                       | 0.032            |
| 0.001                    | 0.001                 | 0.1         | 0.086      | 0.035      | 0.964      | 0.005      | 1.05                        | 0.036            |
| 0.1                      | 1                     | 0.1         | 0.076      | 0.045      | 0.959      | 0.007      | 1.035                       | 0.045            |
| 1                        | 0.01                  | 0.1         | 0.045      | 0.126      | 0.964      | 0.002      | 1.009                       | 0.126            |
| 0.01                     | 1                     | 0.1         | 0.045      | 0.083      | 0.954      | 0.006      | 0.999                       | 0.084            |
| 0.001                    | 1                     | 0.1         | -0.033     | 0.064      | 0.956      | 0.005      | 0.922                       | 0.064            |
| 1                        | 0.1                   | 0.1         | -0.042     | 0.028      | 0.965      | 0.003      | 0.922                       | 0.028            |
| 1                        | 0.001                 | 0.1         | -0.08      | 0.045      | 0.964      | 0.004      | 0.884                       | 0.046            |
| 0.01                     | 0.1                   | 0.1         | -0.316     | 0.124      | 0.958      | 0.01       | 0.642                       | 0.125            |
| 0.001                    | 0.1                   | 0.1         | -0.331     | 0.152      | 0.959      | 0.007      | 0.628                       | 0.152            |
| 0.1                      | 0.1                   | 0.1         | -0.402     | 0.087      | 0.959      | 0.007      | 0.556                       | 0.088            |
| 0.1                      | 0.01                  | 1           | -1.38      | 0.14       | 0.935      | 0.012      | -0.445                      | 0.14             |
| 0.01                     | 0.001                 | 1           | -1.39      | 0.248      | 0.928      | 0.009      | -0.463                      | 0.248            |
| 1                        | 0.01                  | 1           | -1.417     | 0.091      | 0.923      | 0.014      | -0.495                      | 0.092            |
| 1                        | 0.1                   | 1           | -1.456     | 0.164      | 0.919      | 0.014      | -0.538                      | 0.165            |
| 0.001                    | 0.1                   | 1           | -1.477     | 0.221      | 0.911      | 0.017      | -0.566                      | 0.222            |
| 0.01                     | 0.01                  | 1           | -1.508     | 0.082      | 0.93       | 0.003      | -0.578                      | 0.082            |
| 1                        | 0.001                 | 1           | -1.517     | 0.216      | 0.934      | 0.011      | -0.583                      | 0.216            |
| 0.01                     | 0.1                   | 1           | -1.508     | 0.139      | 0.924      | 0.01       | -0.584                      | 0.14             |
| 0.1                      | 0.001                 | 1           | -1.51      | 0.199      | 0.924      | 0.015      | -0.587                      | 0.2              |
| 1                        | 1                     | 1           | -1.521     | 0.381      | 0.907      | 0.022      | -0.614                      | 0.381            |
| 0.001                    | 0.001                 | 1           | -1.574     | 0.14       | 0.922      | 0.008      | -0.652                      | 0.14             |
| 0.001                    | 0.01                  | 1           | -1.622     | 0.213      | 0.928      | 0.011      | -0.694                      | 0.213            |
| 0.1                      | 0.1                   | 1           | -1.678     | 0.297      | 0.918      | 0.021      | -0.76                       | 0.297            |
| 0.1                      | 1                     | 1           | -1.999     | 0.39       | 0.9        | 0.016      | -1.1                        | 0.39             |
| 0.001                    | 1                     | 1           | -2.057     | 0.354      | 0.893      | 0.014      | -1.164                      | 0.355            |
| 0.01                     | 1                     | 1           | -2.247     | 0.303      | 0.898      | 0.02       | -1.349                      | 0.304            |
